# Supplementary material for: Integration of TP53, DREAM, MMB-FOXM1 and RB-E2F target gene analyses identifies cell cycle gene regulatory networks
Source: PubMed Central journal article supplement — Nucleic Acids Res. 2016 Jun 8;44(13):6070–86. doi: 10.1093/nar/gkw523 (PMC4994865; doi:10.1093/nar/gkw523), 2016-06-08
Supplement: supp_gkw523_nar-00844-v-2016-File009.pdf [file supp_gkw523_nar-00844-v-2016-File009.pdf]

# Fischer *et al.* Supplementary Figure S1

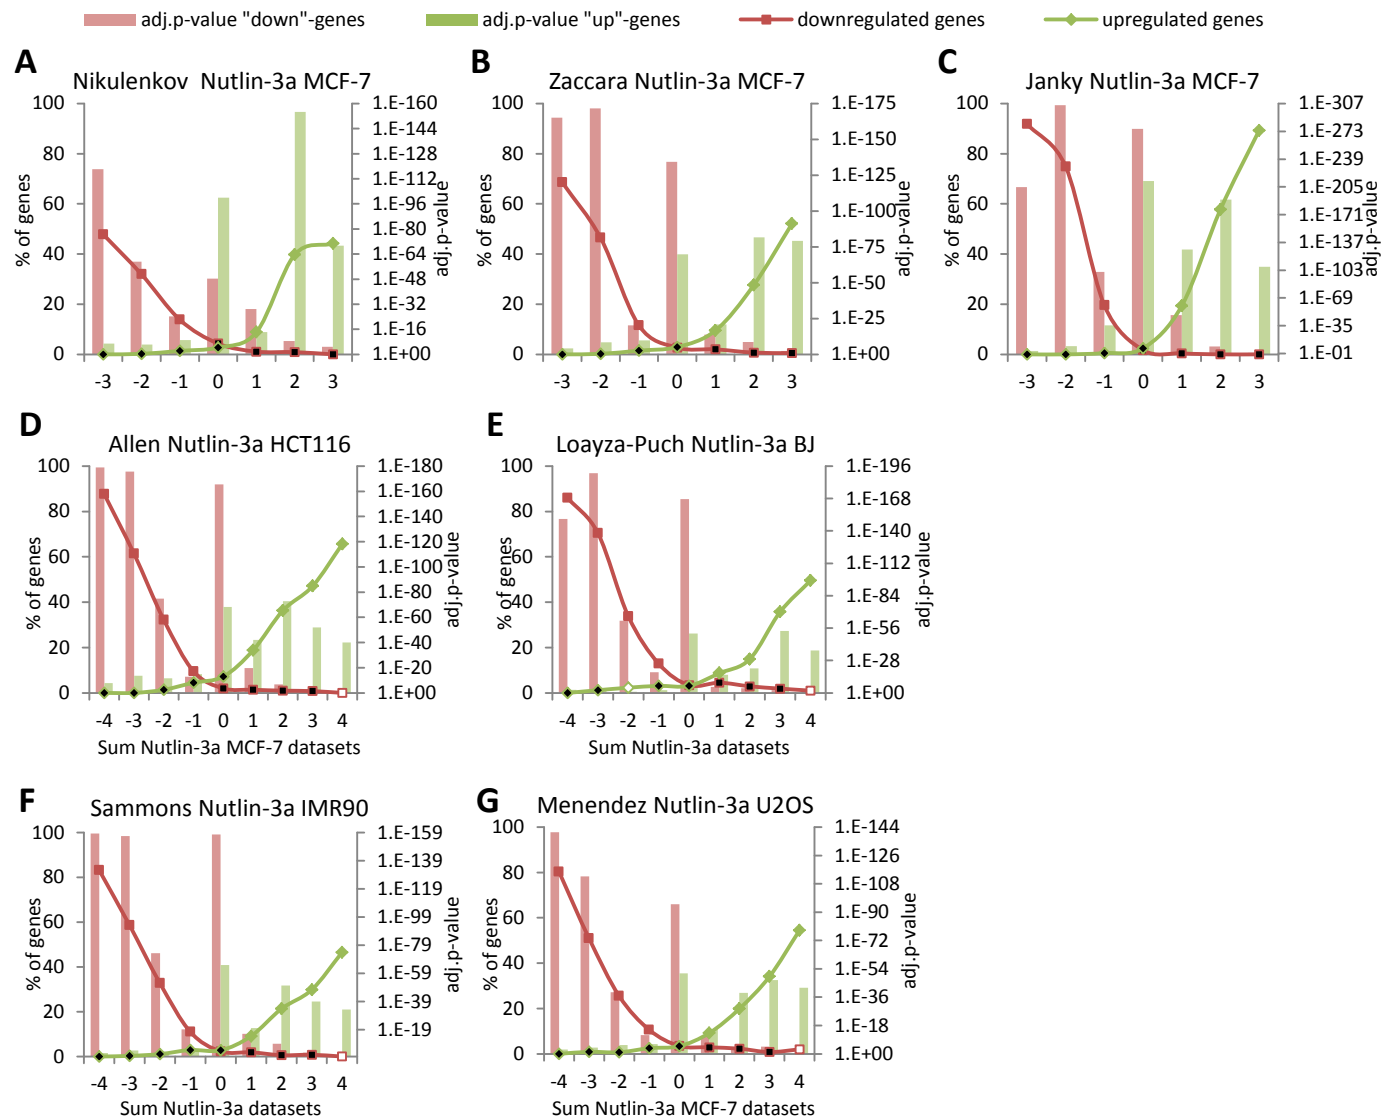

**Supplementary Figure S1. Datasets of TP53-dependent gene regulation from Nutlin-3a treated MCF-7 cells correlate strongly with each other.** For each dataset of TP53-dependent gene regulation a gene can be found as upregulated “+1”, downregulated “-1”, or not regulated “0”. The number of genes identified in **(A)** Nikulenkov et al, **(B)** Zaccara et al., and **(C)** Janky et al. as either upregulated or downregulated is compared to the sum of the remaining three datasets from Nutlin-3a treated MCF-7 cells. The number of genes identified in **(D)** Allen et al., **(E)** Loayza-Puch et al., **(F)** Sammons et al. and **(G)** Menendez et al. compared to the sum of the four Nutlin-3a MCF-7 datasets. A two-sided Fisher’s exact test was employed to test for significant over- and under-representation of gene sets and p-values were adjusted for multiple testing using Bonferroni correction. Colored and black data points are significantly over- and underrepresented, respectively (adj.p-value  $\leq 0.05$ ). White data points are not significantly different.

# Fischer *et al.* Supplementary Figure S2

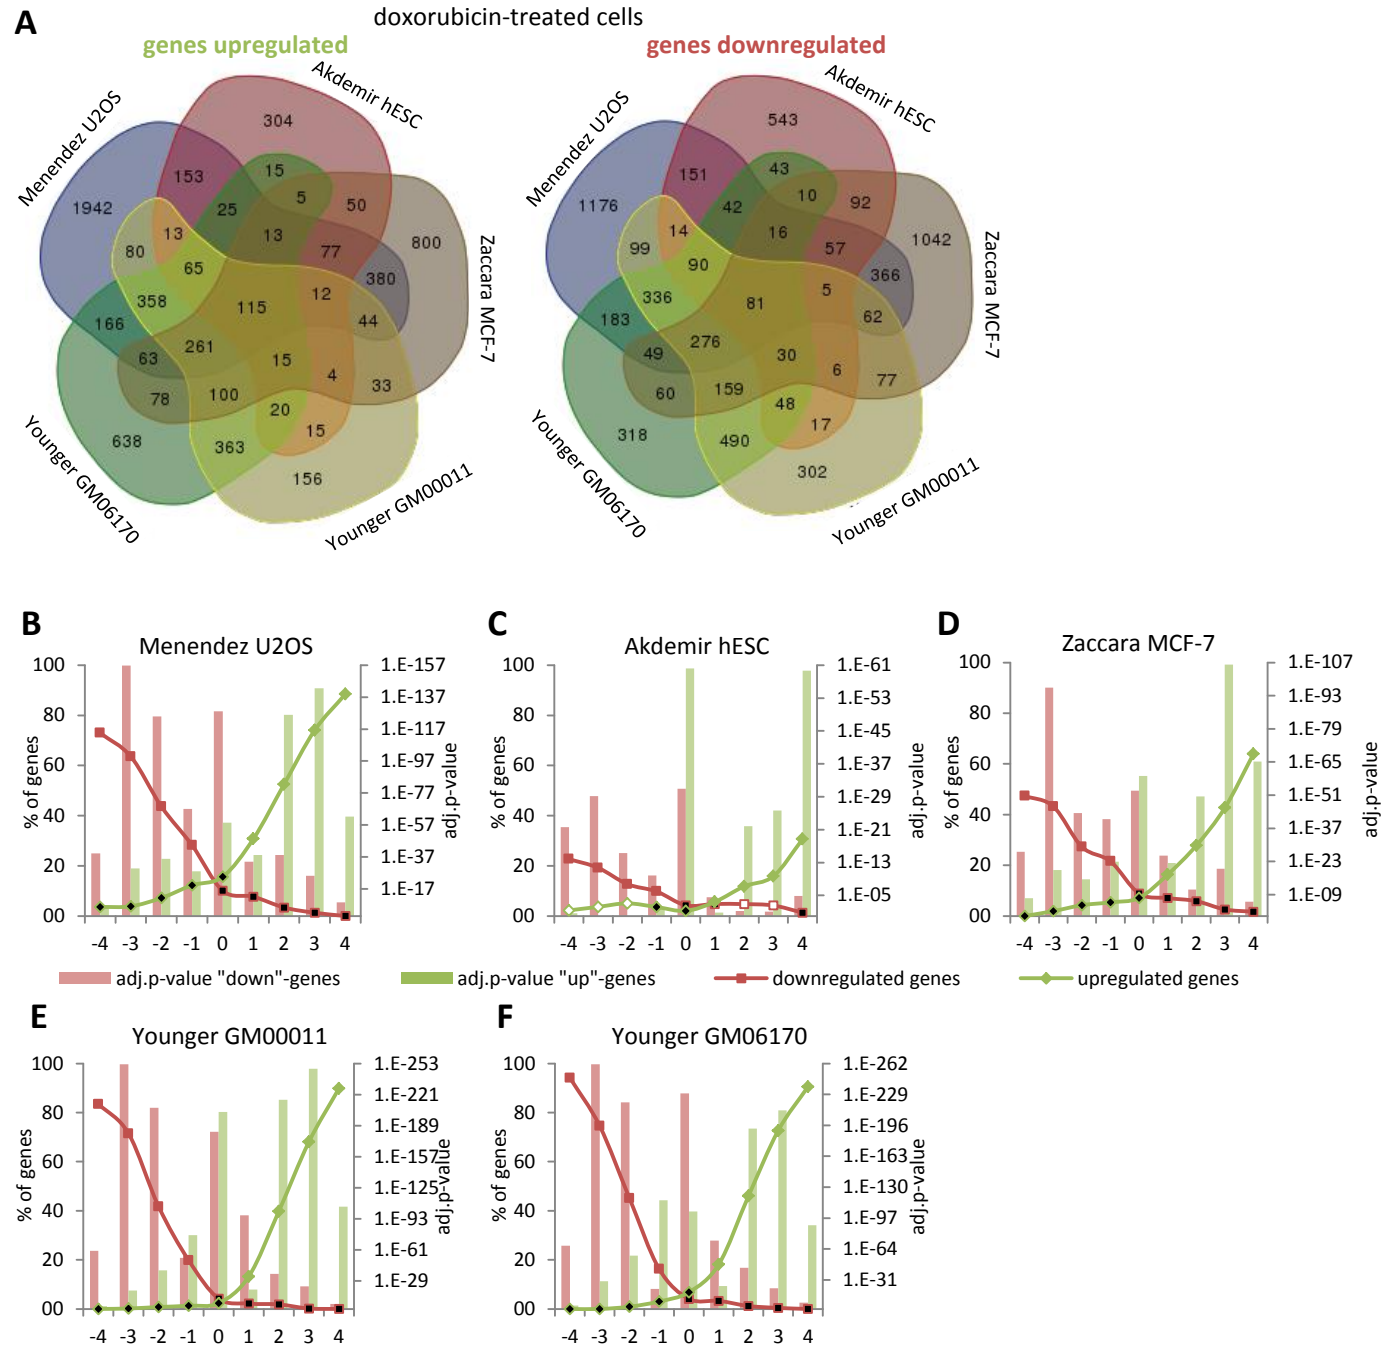

**Supplementary Figure S2. Integration of expression profiling datasets of doxorubicin treated cells. (A)** Venn diagram displaying the overlap of genes that were detected as being TP53-dependently up- or downregulated in the doxorubicin datasets from Menendez *et al.*, Akdemir *et al.*, Zaccara *et al.*, and Younger *et al.* **(B)** The number of genes identified in (B) Menendez *et al.*, **(C)** Akdemir *et al.*, **(D)** Zaccara *et al.* and **(E and F)** Younger *et al.* as being TP53-dependently up- or downregulated is compared to the sum of the remaining four doxorubicin datasets. A two-sided Fisher's exact test was employed to test for significant over- and under-representation of gene sets and p-values were adjusted for multiple testing using Bonferroni correction. Colored and black data points are significantly over- and underrepresented, respectively ( $\text{adj.p-value} \leq 0.05$ ). White data points are not significantly different.

# Fischer *et al.* Supplementary Figure S3

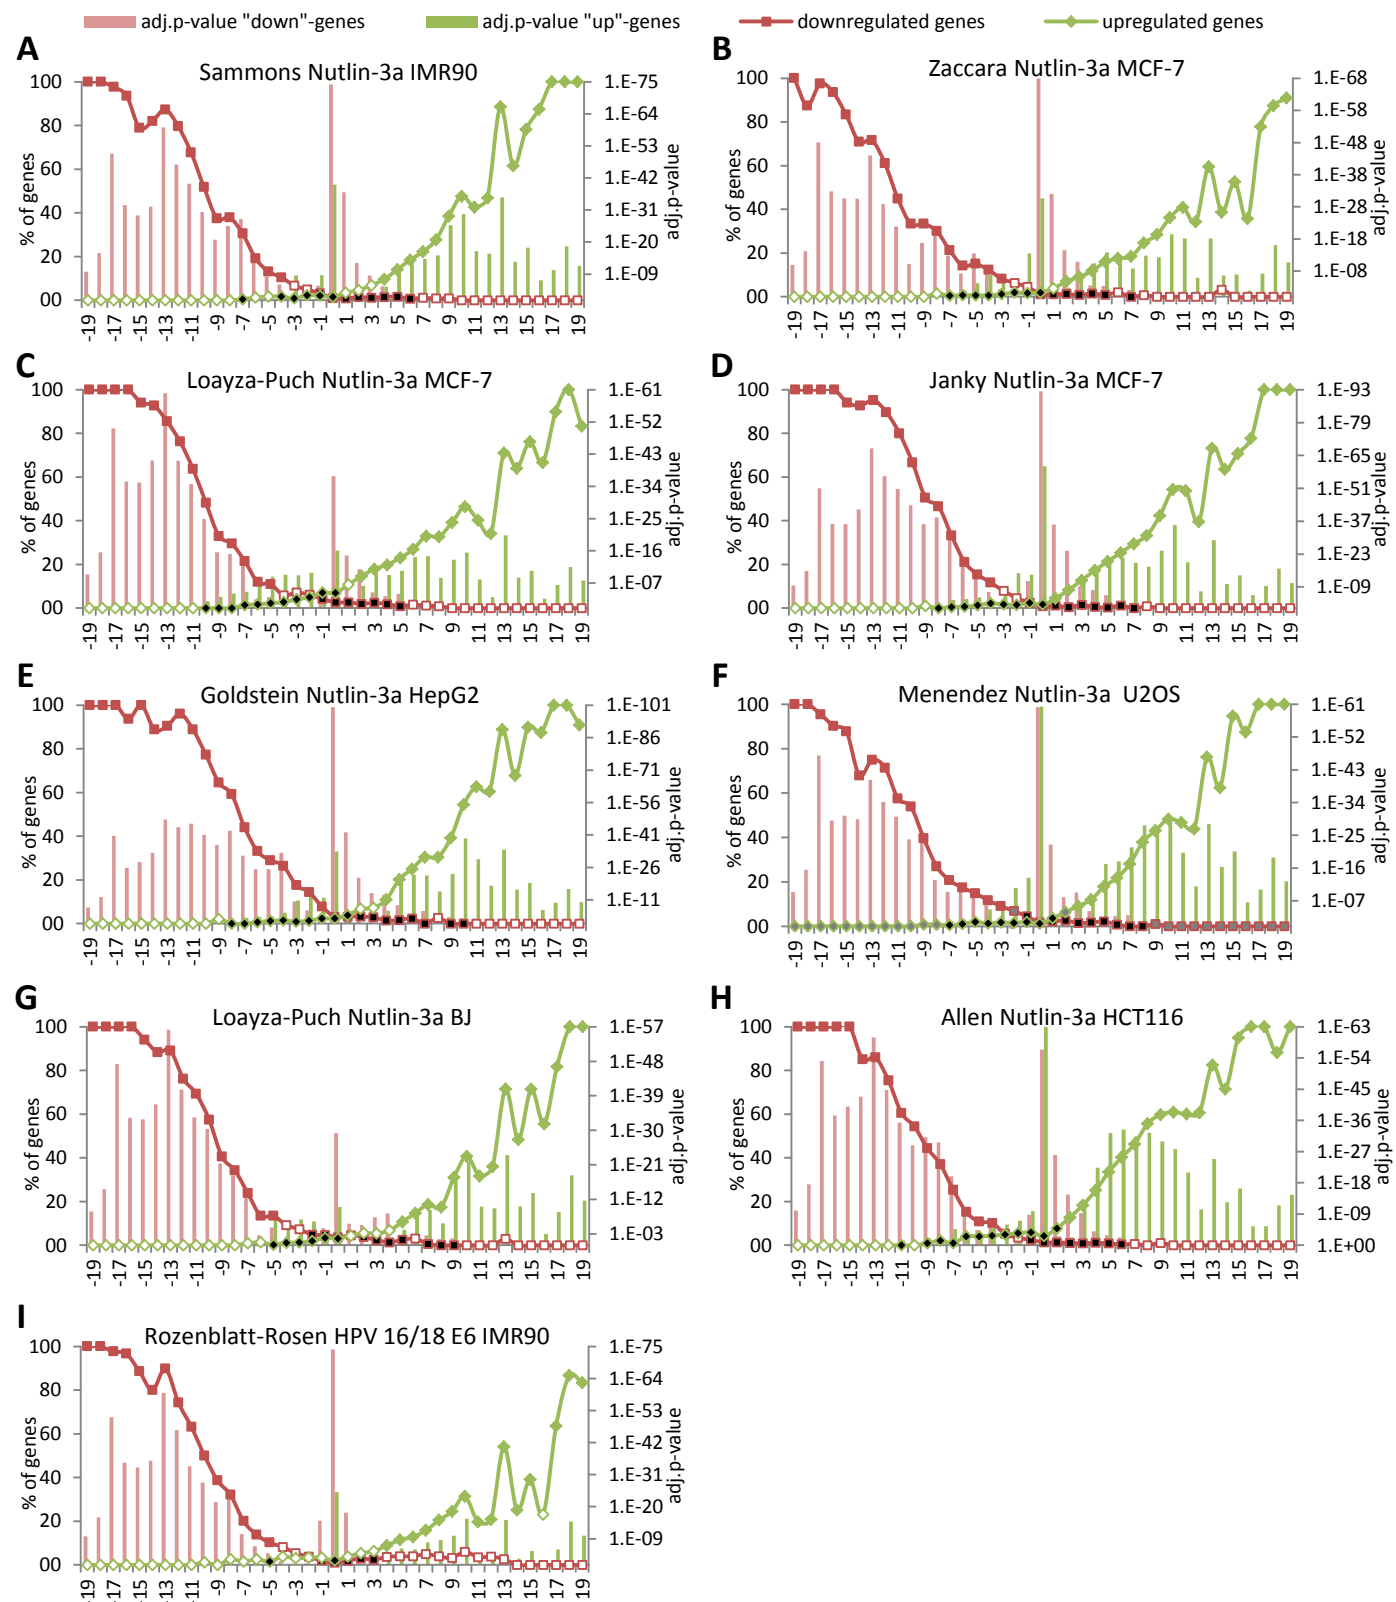

**Supplementary Figure S3. Meta-analysis of TP53-dependent gene expression leads to a robust combined pan cell type and treatment dataset.** In each dataset on TP53-dependent gene regulation a gene can be found as upregulated “+1”, downregulated “-1”, or not regulated “0”. The number of genes identified in (A) Sammons *et al.*, (B) Zaccara *et al.*, (C and G) Loayza-Puch *et al.*, (D) Janky *et al.*, (E) Goldstein *et al.*, (F) Menendez *et al.*, (H) Allen *et al.* and (I) Rozenblatt-Rosen *et al.* datasets as either upregulated or downregulated by TP53 is compared to the sum of the remaining 19 datasets. A two-sided Fisher’s exact test was employed to test for significant over- and under-representation of gene sets and p-values were adjusted for multiple testing using Bonferroni correction. Colored and black data points are significantly over- and under-represented, respectively (adj.p-value  $\leq 0.05$ ). White data points are not significantly different.

# Fischer *et al.* Supplementary Figure S4

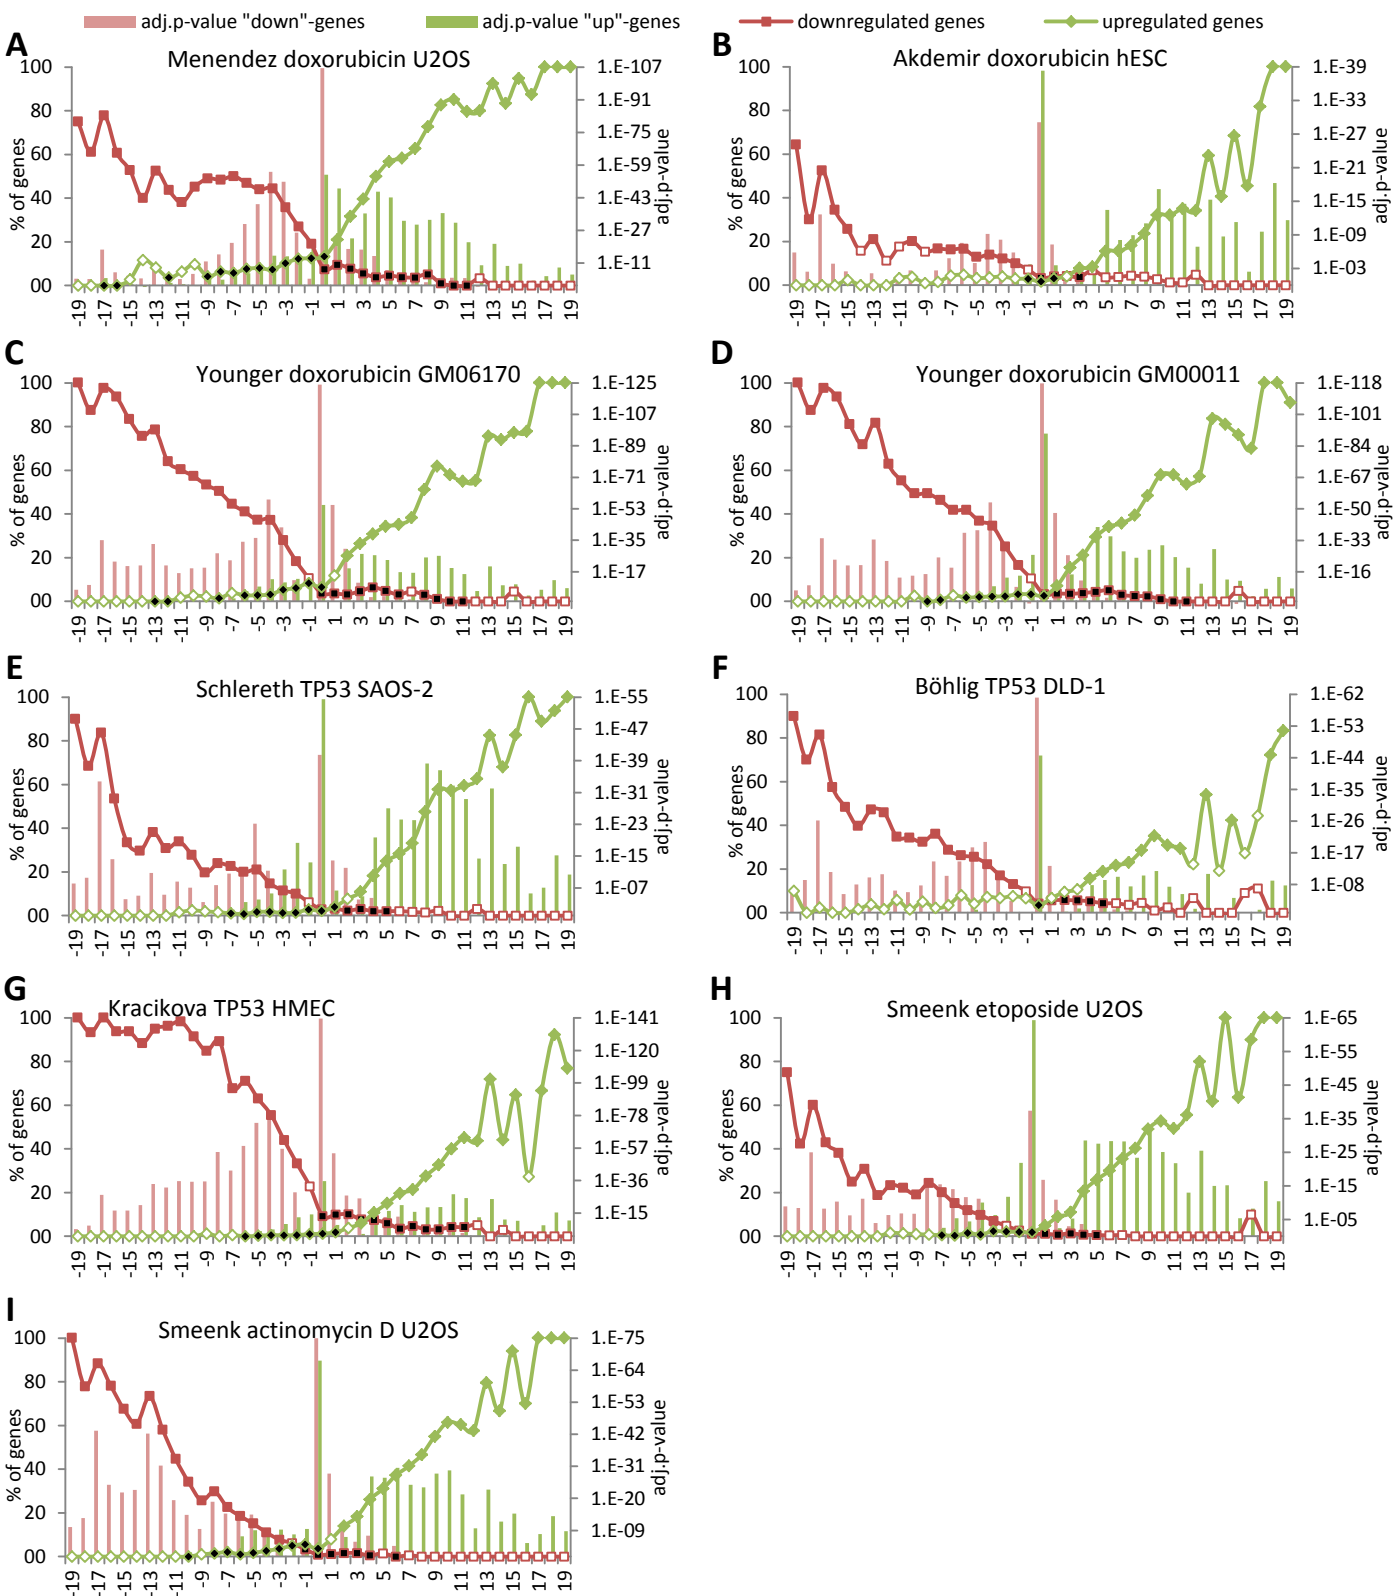

**Supplementary Figure S4. Meta-analysis of TP53-dependent gene expression leads to a robust combined pan cell type and treatment dataset.** In each dataset on TP53-dependent gene regulation a gene can be found as upregulated “+1”, downregulated “-1”, or not regulated “0”. The number of genes identified in **(A)** Menendez et al., **(B)** Akdemir et al., **(C and D)** Younger et al., **(E)** Schlereth et al., **(F)** Böhlig et al., **(G)** Kracikova et al. and **(H and I)** Smeenk et al. datasets as either upregulated or downregulated by TP53 is compared to the sum of the remaining 19 datasets. A two-sided Fisher’s exact test was employed to test for significant over- and under-representation of gene sets and p-values were adjusted for multiple testing using Bonferroni correction. Colored and black data points are significantly over- and underrepresented, respectively (adj.p-value  $\leq 0.05$ ). White data points are not significantly different.

# Fischer *et al.* Supplementary Figure S5

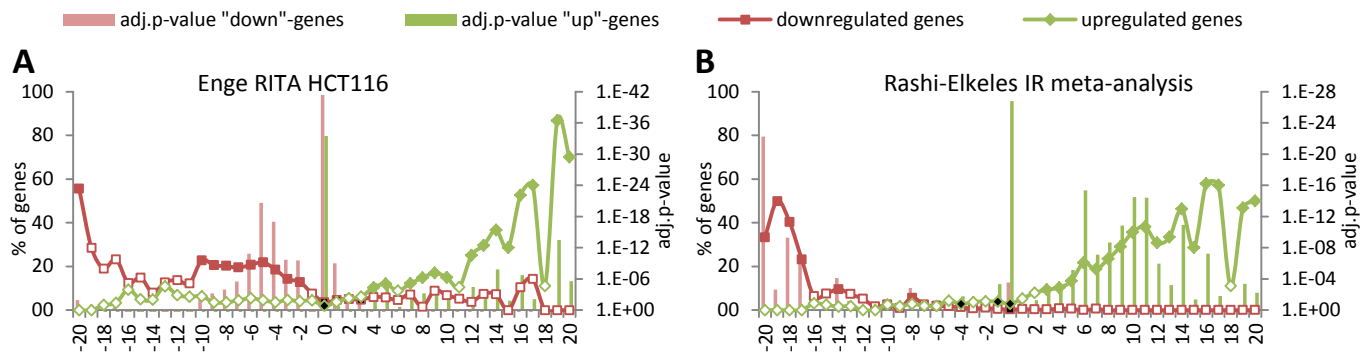

**Supplementary Figure S5. RITA and ionizing radiation treatment yield distinct expression profiles.** The number of genes identified in **(A)** Enge *et al.* and **(B)** Rashi-Elkeles *et al.* datasets as either upregulated or downregulated by TP53 is compared to the 41 *p53 Expression Score* groups. A two-sided Fisher’s exact test was employed to test for significant over- and under-representation of gene sets and p-values were adjusted for multiple testing using Bonferroni correction. Colored and black data points are significantly over- and underrepresented, respectively (adj.p-value  $\leq 0.05$ ). White data points are not significantly different.

# Fischer et al. Supplementary Figure S6

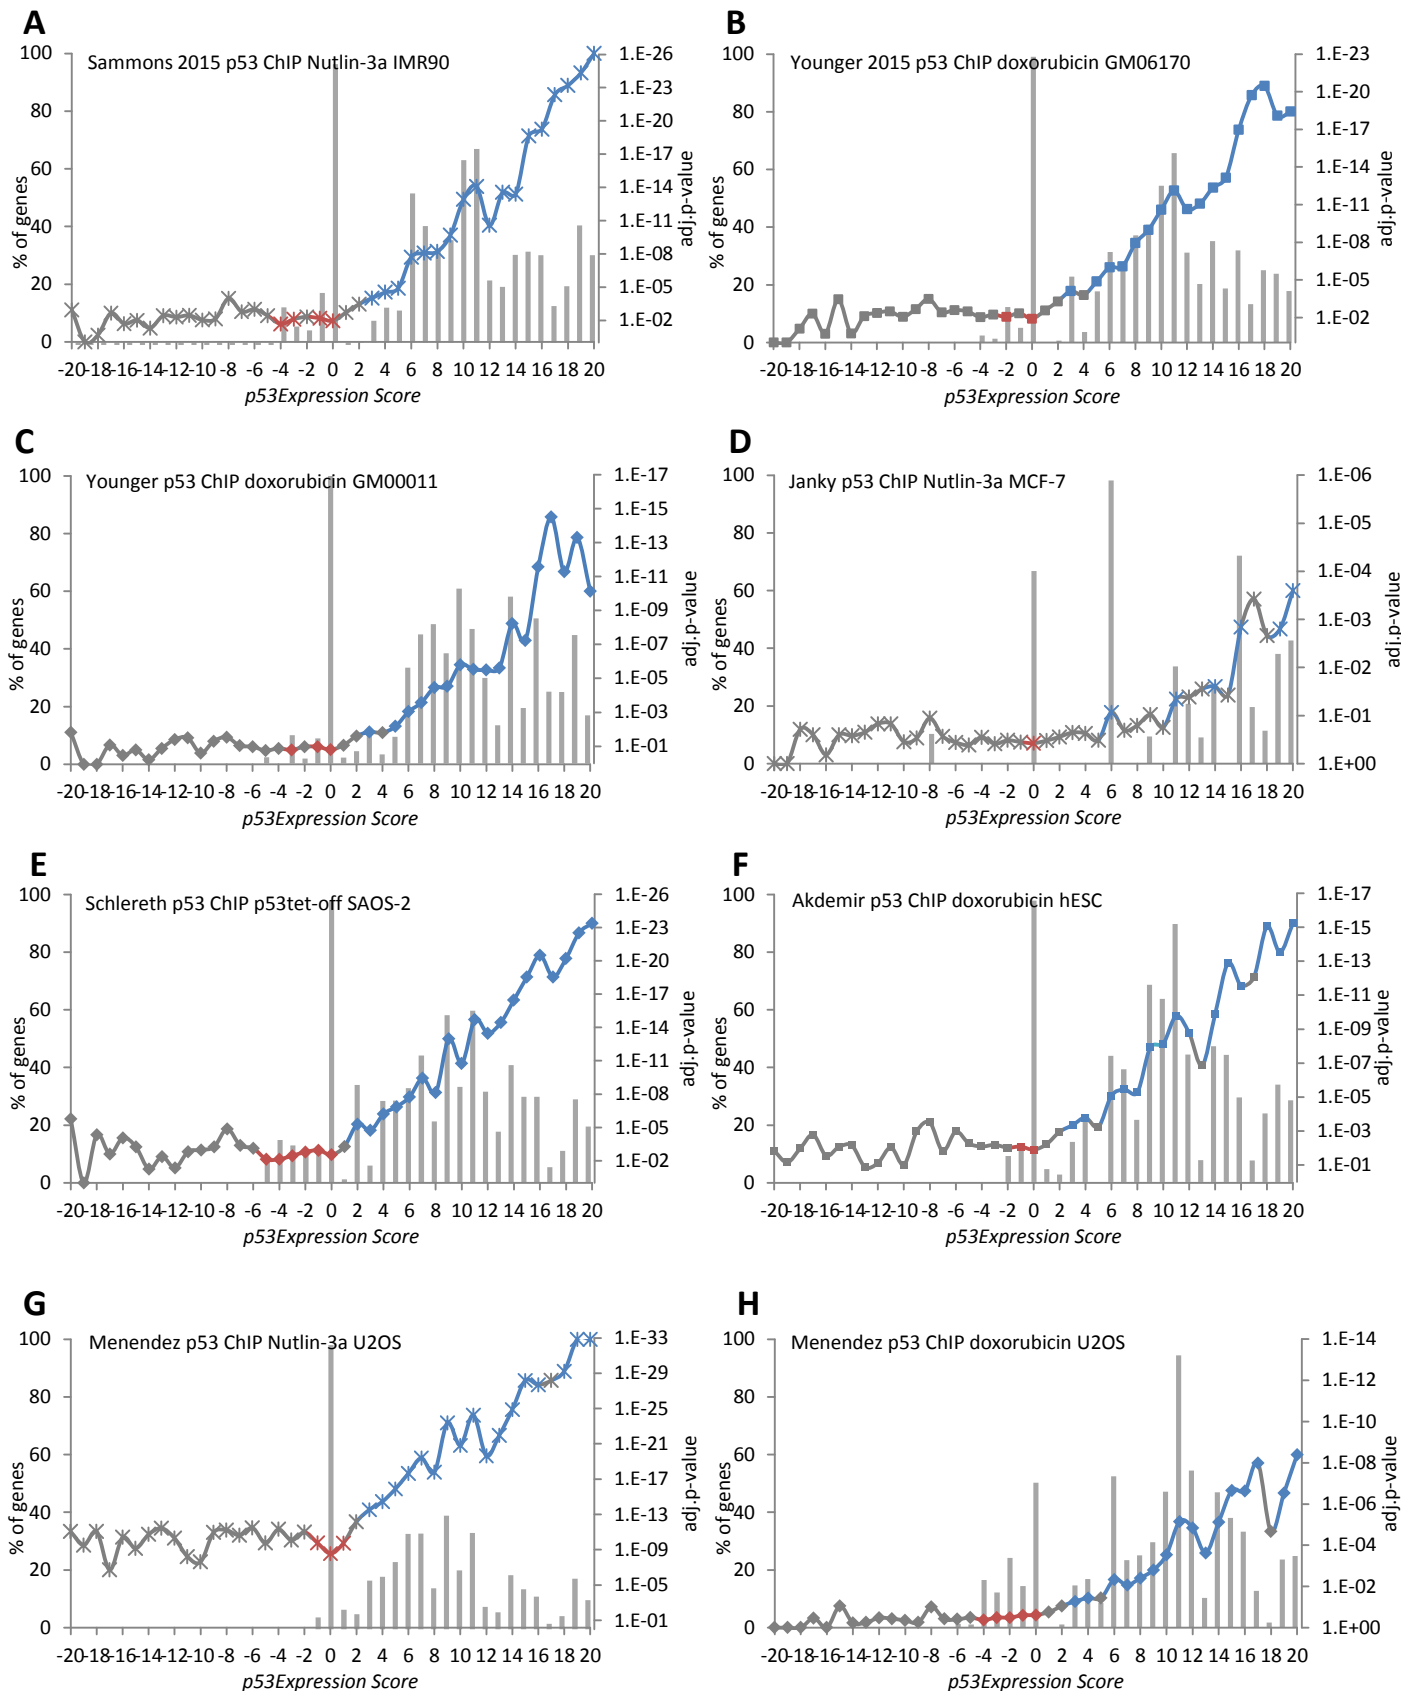

**Supplementary Figure S6. TP53 chromatin binding associated with gene activation.** The number genes found to be bound by TP53 within  $\pm 25$  kb from their TSS across the 41 *p53 Expression Score* groups according to the datasets by (A) Sammons et al., (B and C) Younger et al., (D) Janky et al., (E) Schlereth et al., (F) Akdemir et al. and (G and H) Menendez et al.. Blue and red data points are significantly over- and underrepresented, respectively (adj.p-value  $\leq 0.05$ ). Grey data points are not significantly different. Statistical significance was tested by two sided Fisher's exact test and adjusted for multiple testing using Bonferroni correction.

# Fischer *et al.* Supplementary Figure S7

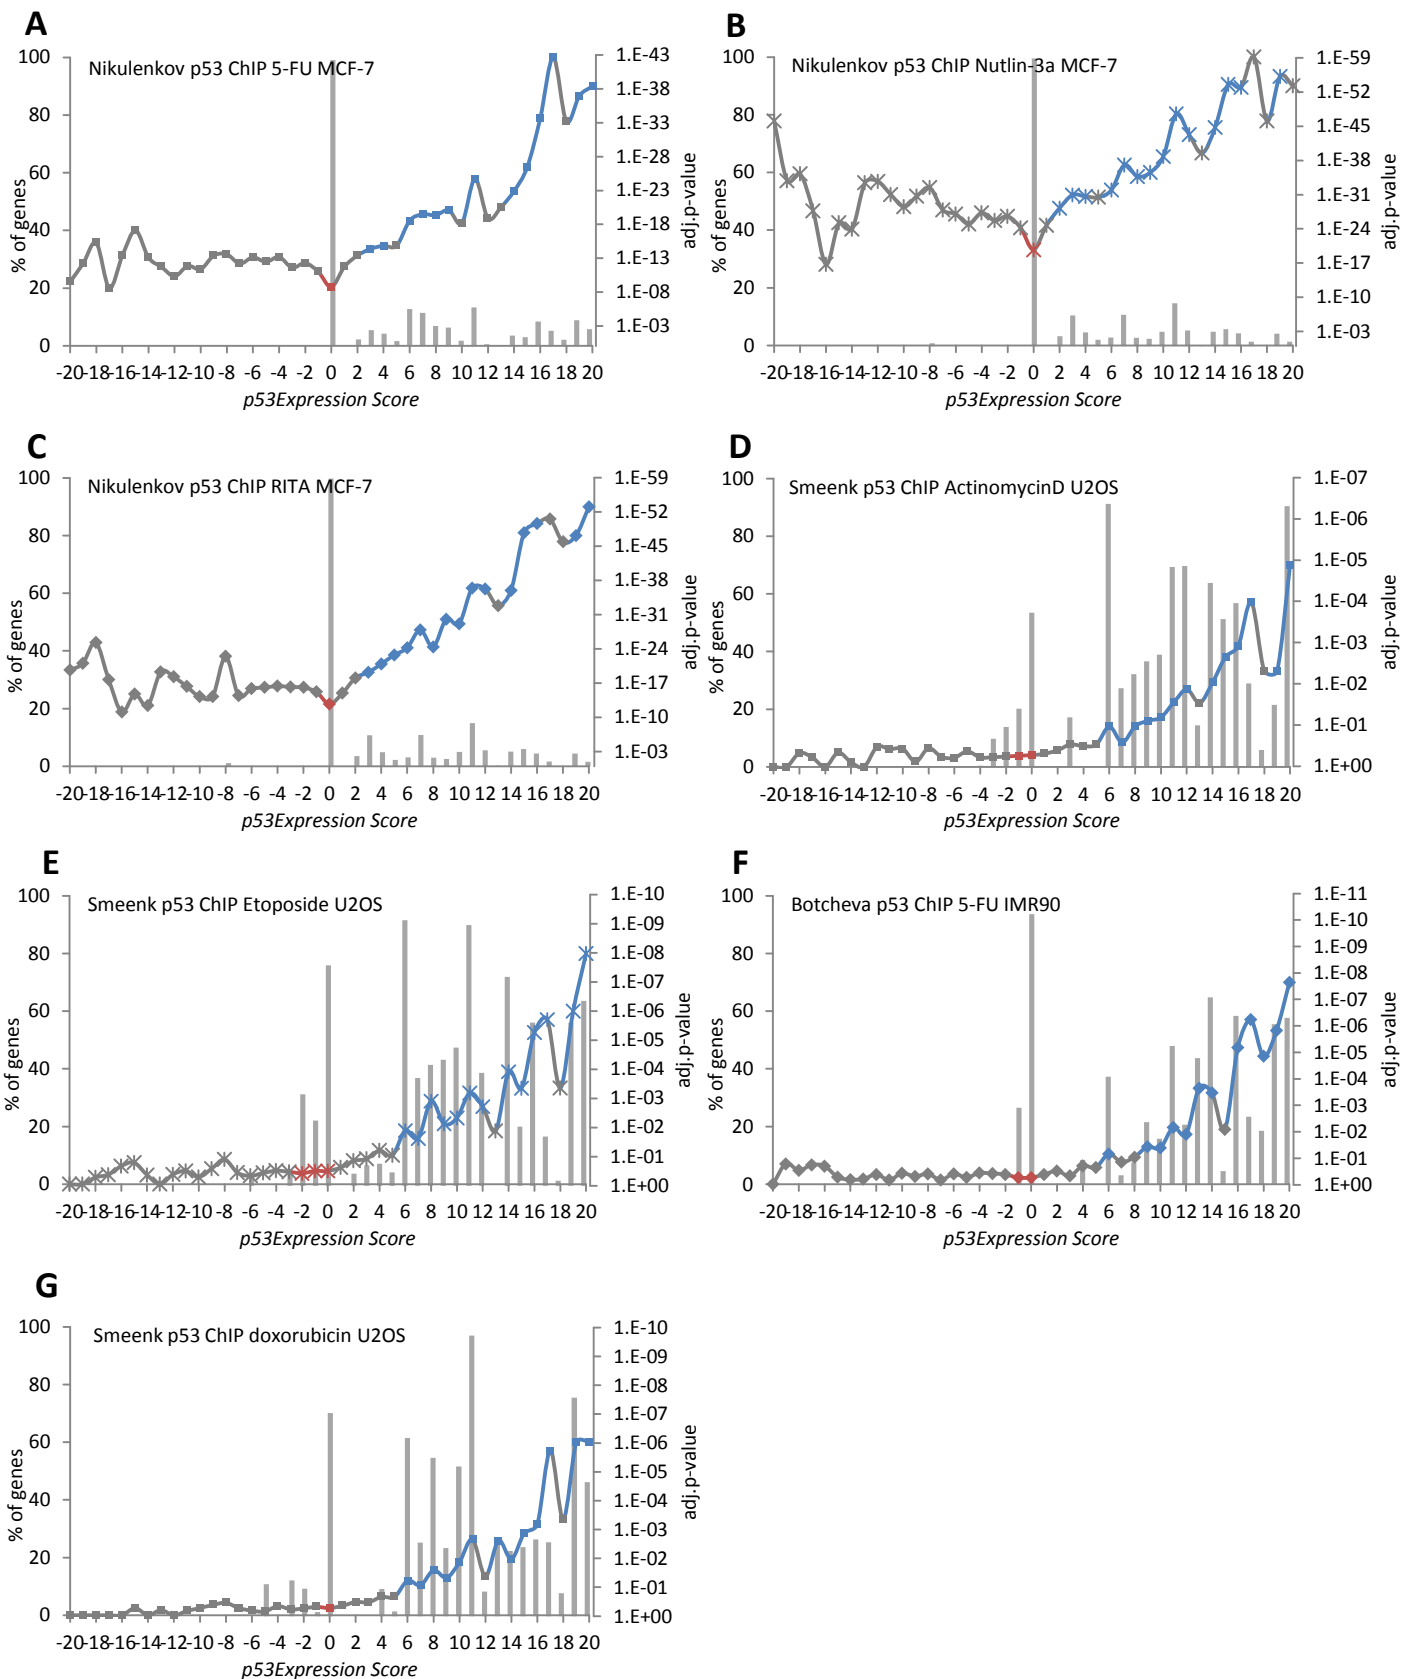

**Supplementary Figure S7. TP53 chromatin binding associated with gene activation.** The number genes found to be bound by TP53 within  $\pm 25$  kb from their TSS across the 41 *p53 Expression Score* groups according to the datasets by **(A-C)** Nikulenkov *et al.*, **(D and E)** Smeenk *et al.* 2011, **(F)** Botcheva *et al.* and **(G)** Smeenk *et al.* 2008. Blue and red data points are significantly over- and underrepresented, respectively ( $\text{adj.p-value} \leq 0.05$ ). Grey data points are not significantly different. Statistical significance was tested by two sided Fisher's exact test and adjusted for multiple testing using Bonferroni correction.

# Fischer *et al.* Supplementary Figure S8

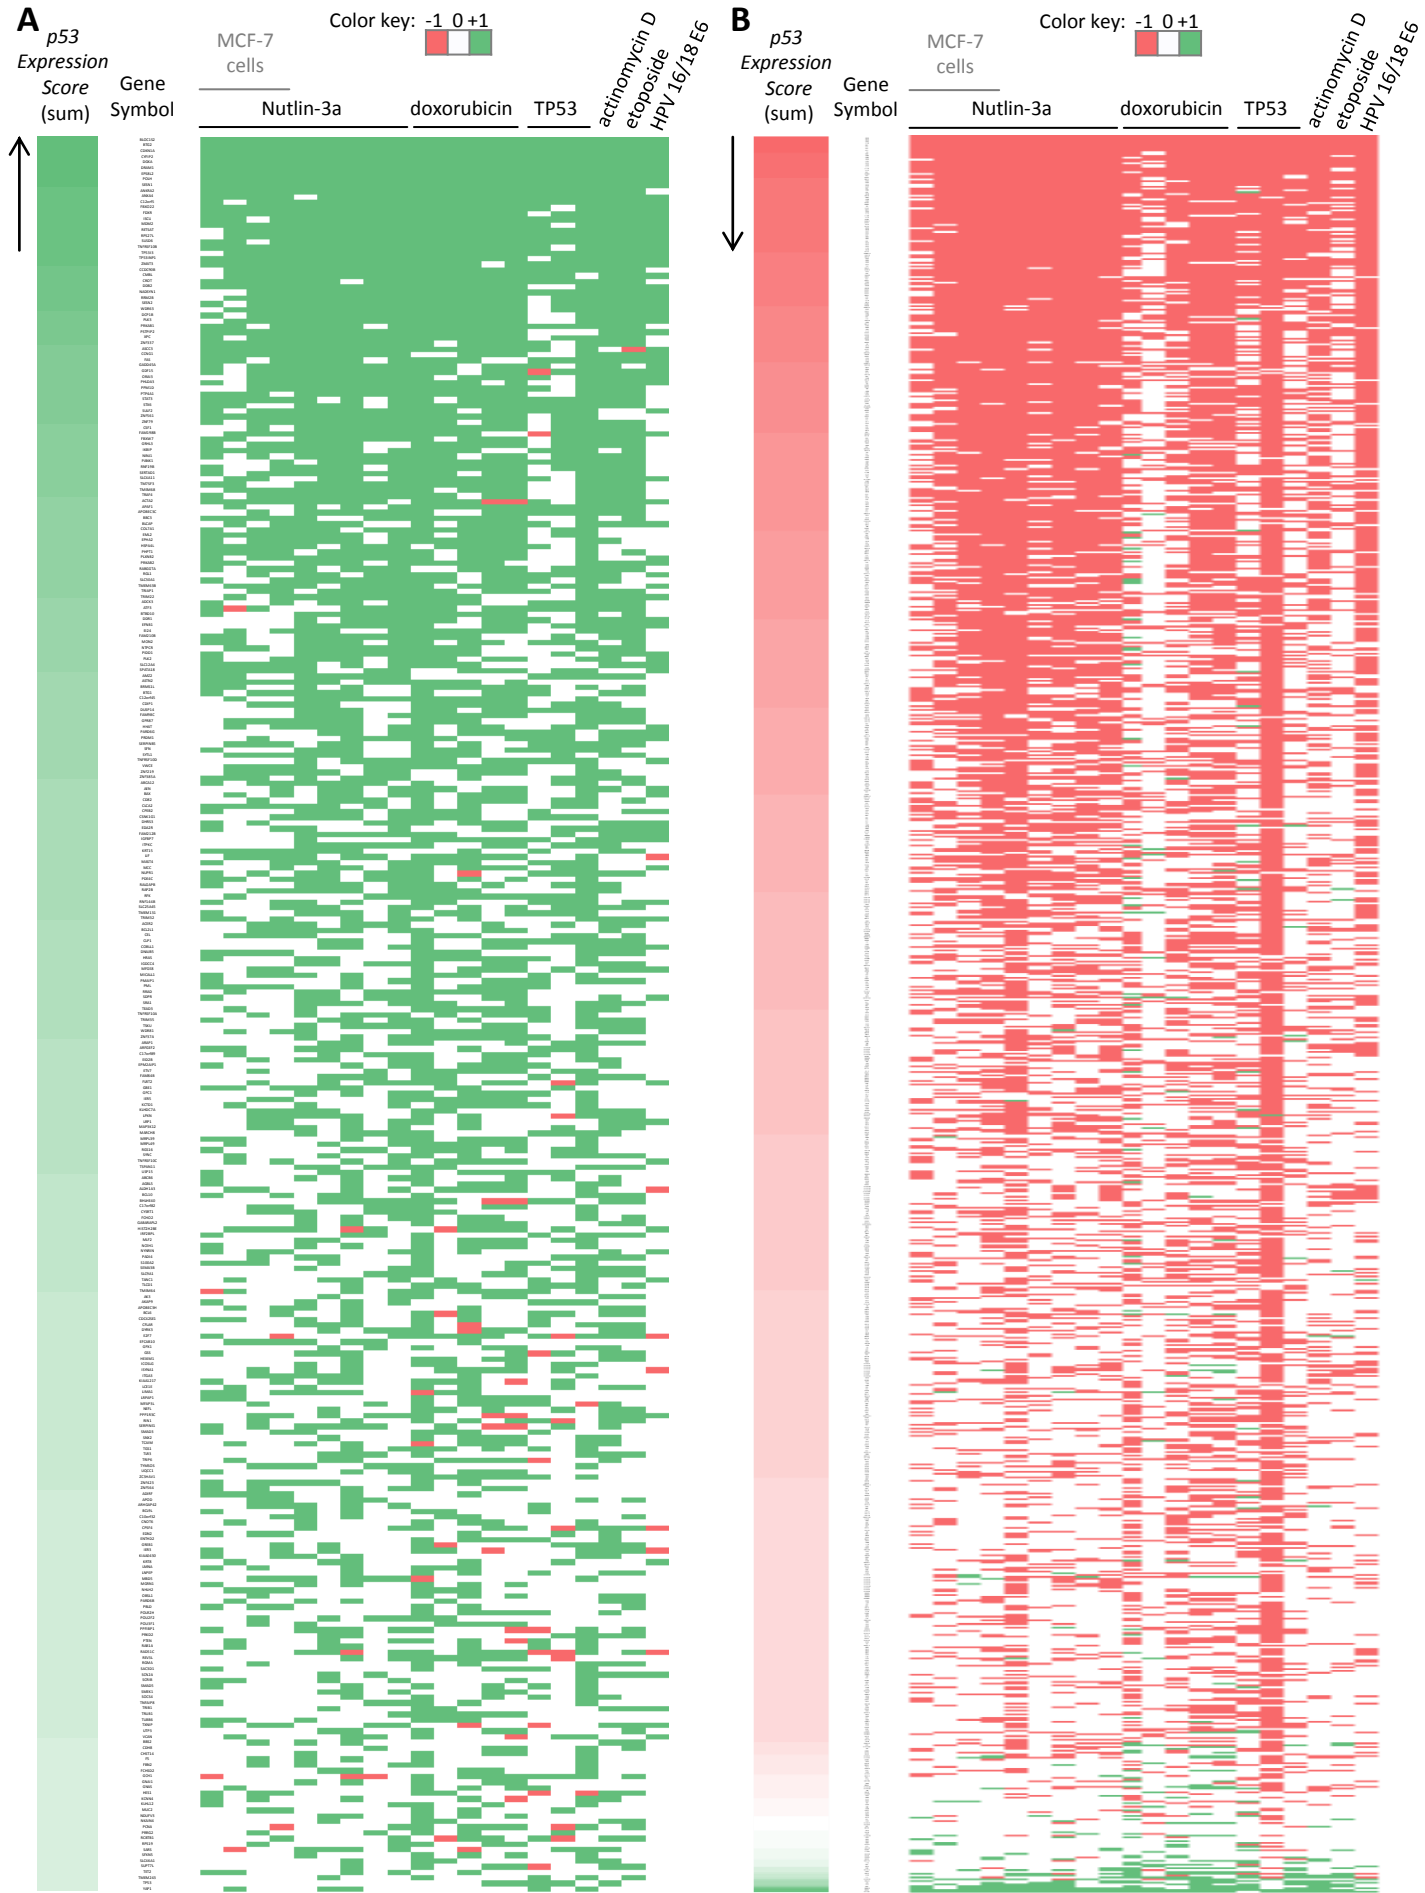

**Supplementary Figure S8. Regulation of TP53 and DREAM targets by TP53.** A heatmap displaying the regulation of the predicted **(A)** 311 TP53 (Table S3) and **(B)** 971 DREAM target genes (Table S7) across the 20 datasets on TP53-dependent gene regulation.



# Fischer *et al.* Supplementary Figure S9

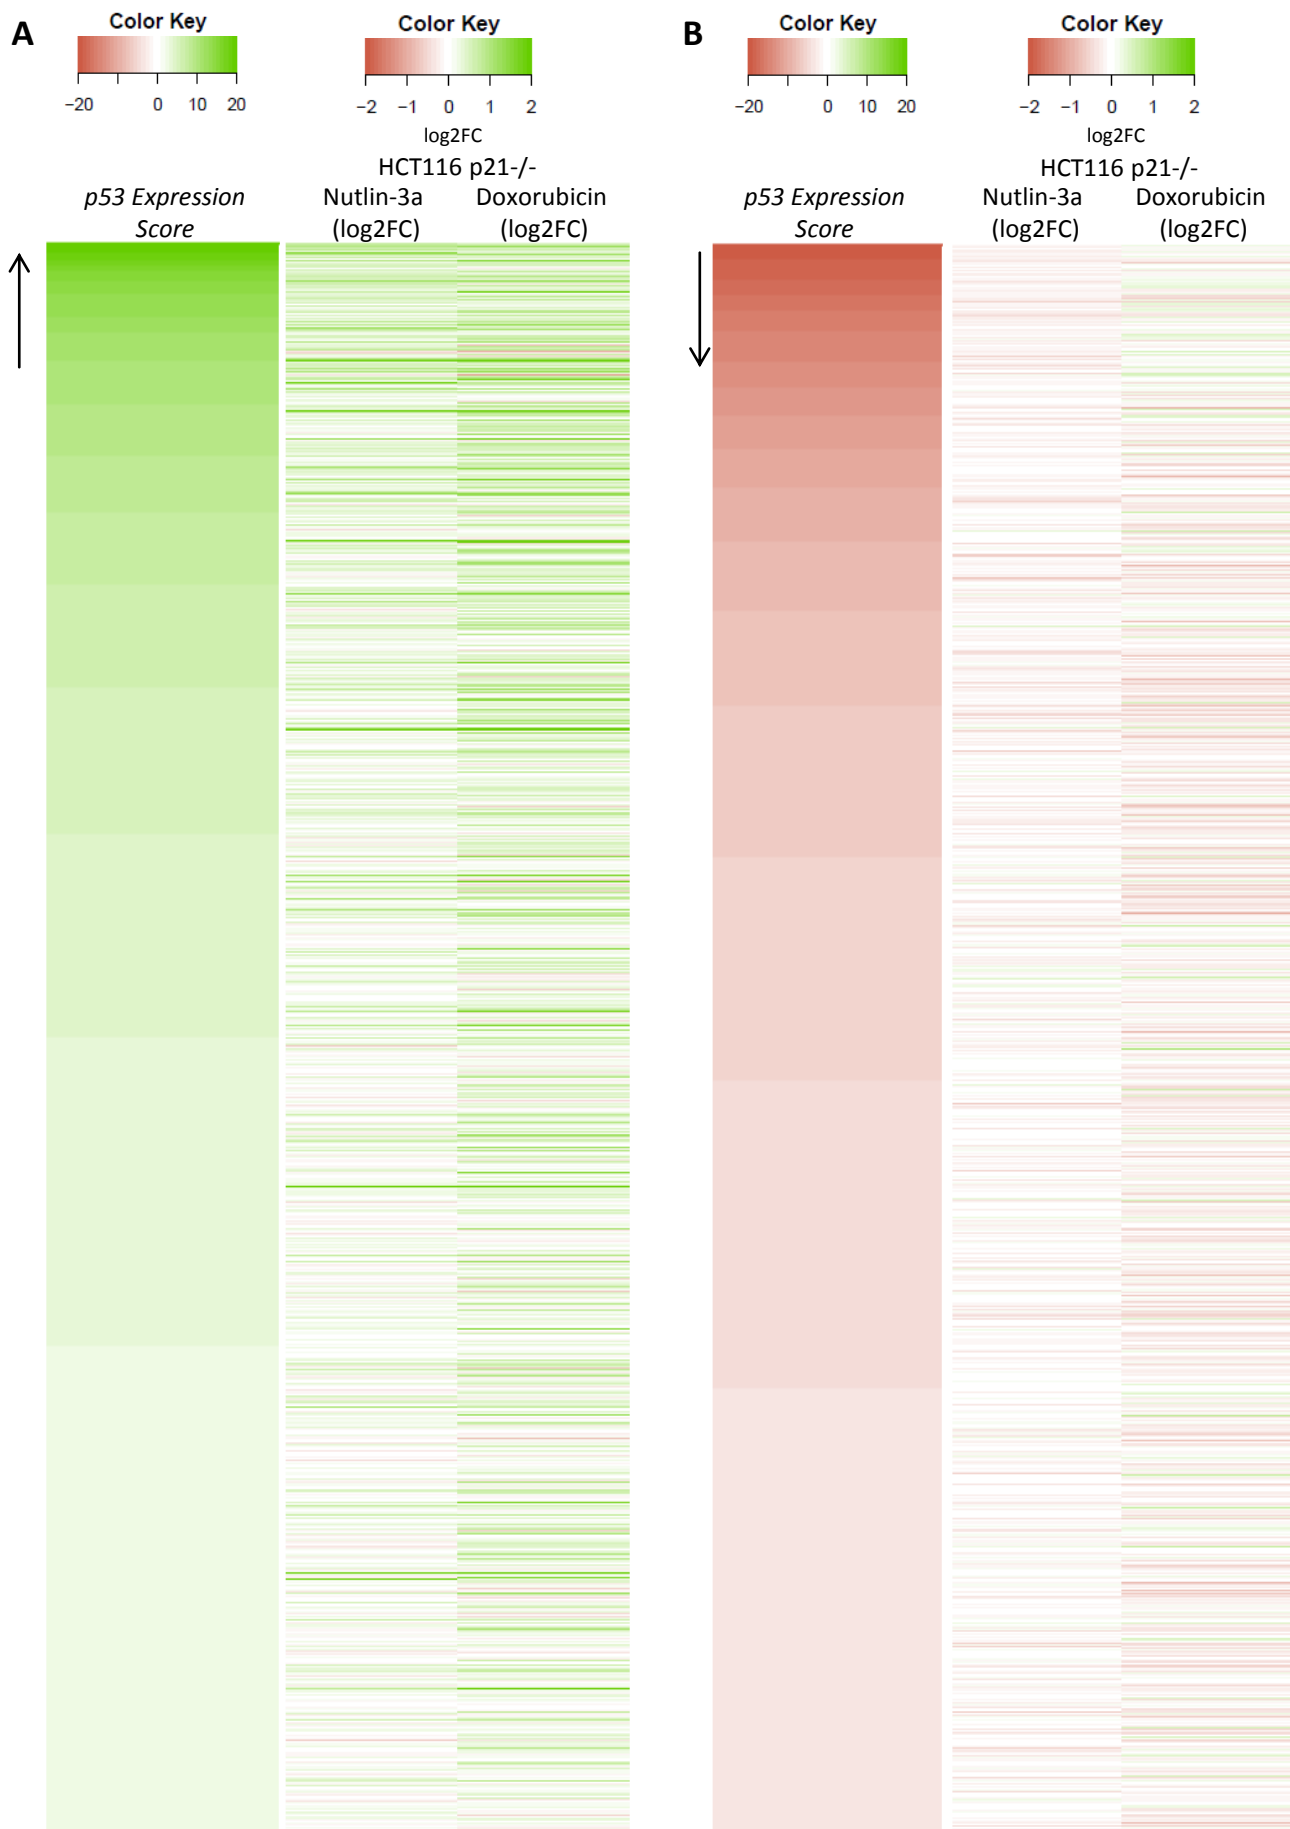

**Supplementary Figure S9. Repression by TP53 requires p21.** A heatmap displaying the log<sub>2</sub>(fold change expression) upon Nutlin-3a or doxorubicin treatment in HCT116 p21<sup>-/-</sup> cells of all genes that have a *p53* Expression Score **(A)**  $\geq 3$  and **(B)**  $\leq -3$ .

# Fischer *et al.* Supplementary Figure S10

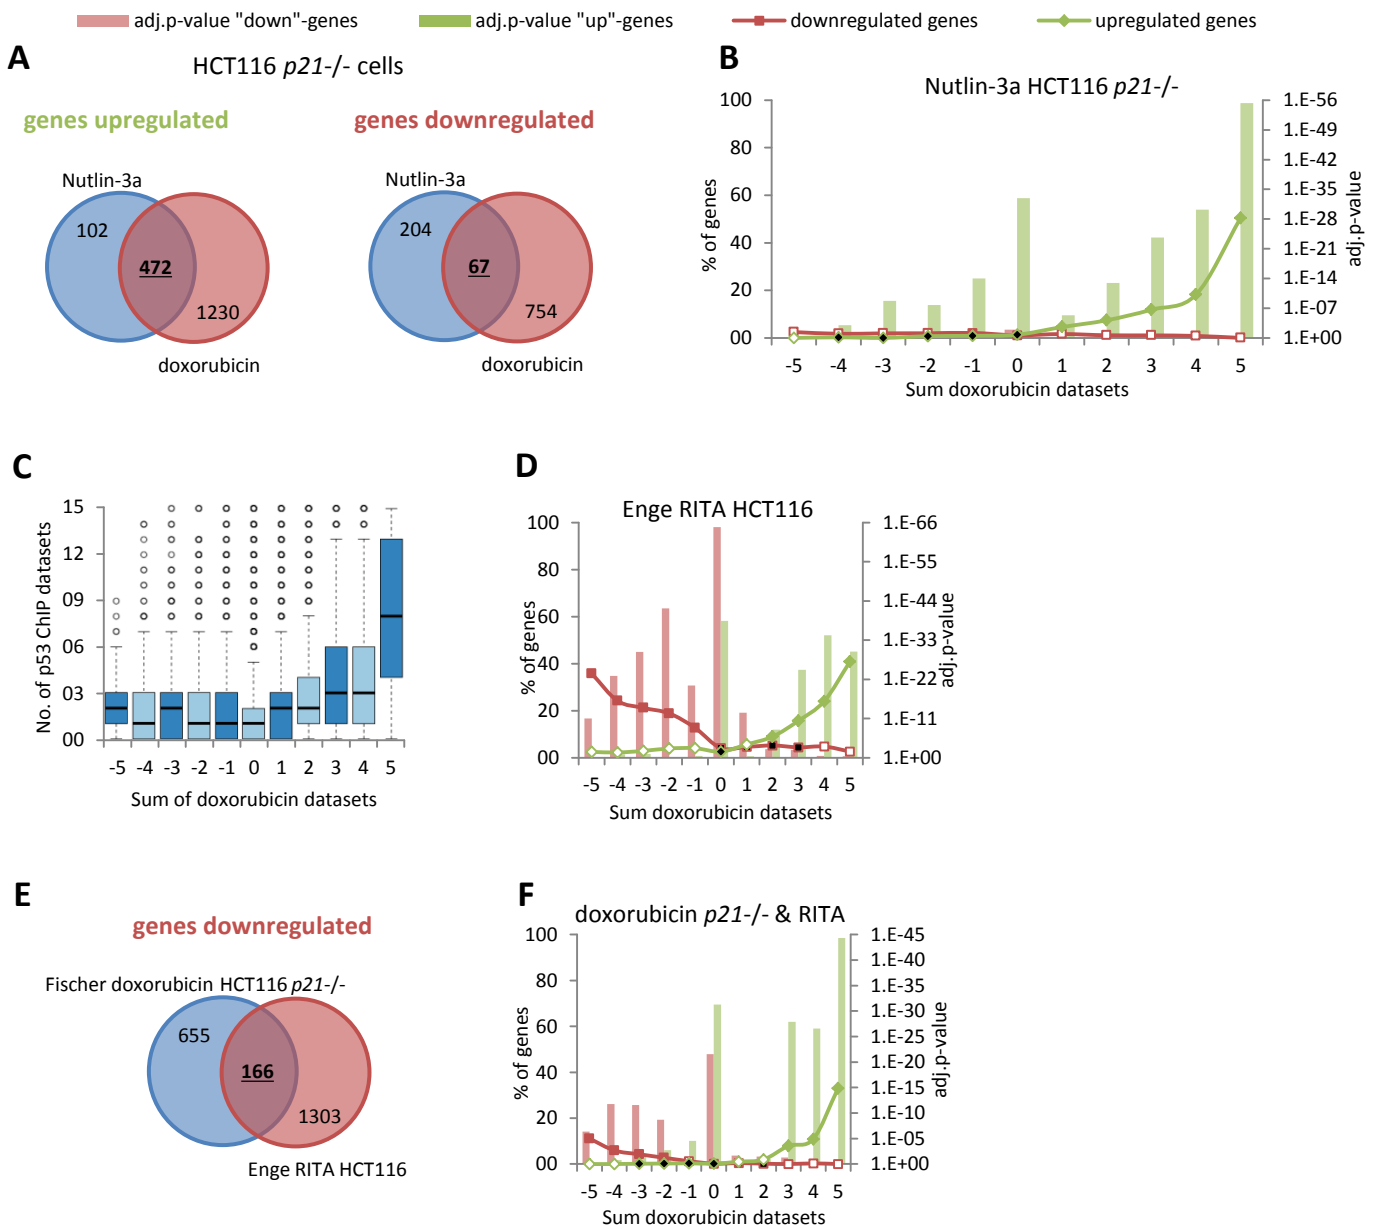

## Supplementary Figure S10. The CDK inhibitor p21 is required for TP53-dependent gene downregulation. (A)

Venn diagram displaying the overlap of genes that were detected as being TP53-dependently up- or downregulated in the datasets from Nutlin-3a and doxorubicin treated HCT116 *p21*<sup>-/-</sup> cells. (B) The number of genes found differentially regulated in Nutlin-3a treated HCT116 *p21*<sup>-/-</sup> cells compared to the five doxorubicin datasets. (C) Boxplot displaying the number of ChIP datasets that find a gene to be bound by TP53 within  $\pm 2.5$  kb from their TSS compared to gene regulation from the sum of the five doxorubicin datasets. (D) The number of genes detected as up- or downregulated in Enge et al. is compared to the five doxorubicin datasets. (E) Venn diagram displaying the overlap of genes that were detected as being TP53-dependently downregulated by Enge et al. and in the dataset from doxorubicin treated HCT116 *p21*<sup>-/-</sup> cells. (F) The number of genes commonly identified in RITA treated HCT116 cells and doxorubicin treated HCT116 *p21*<sup>-/-</sup> cells as up- or downregulated is compared to the sum of the five doxorubicin datasets. A two-sided Fisher's exact test was employed to test for significant over- and under-representation of gene sets and p-values were adjusted for multiple testing using Bonferroni correction. Colored and black data points are significantly over- and underrepresented, respectively (adj.p-value  $\leq 0.05$ ). White data points are not significantly different.

# Fischer *et al.* Supplementary Figure S11

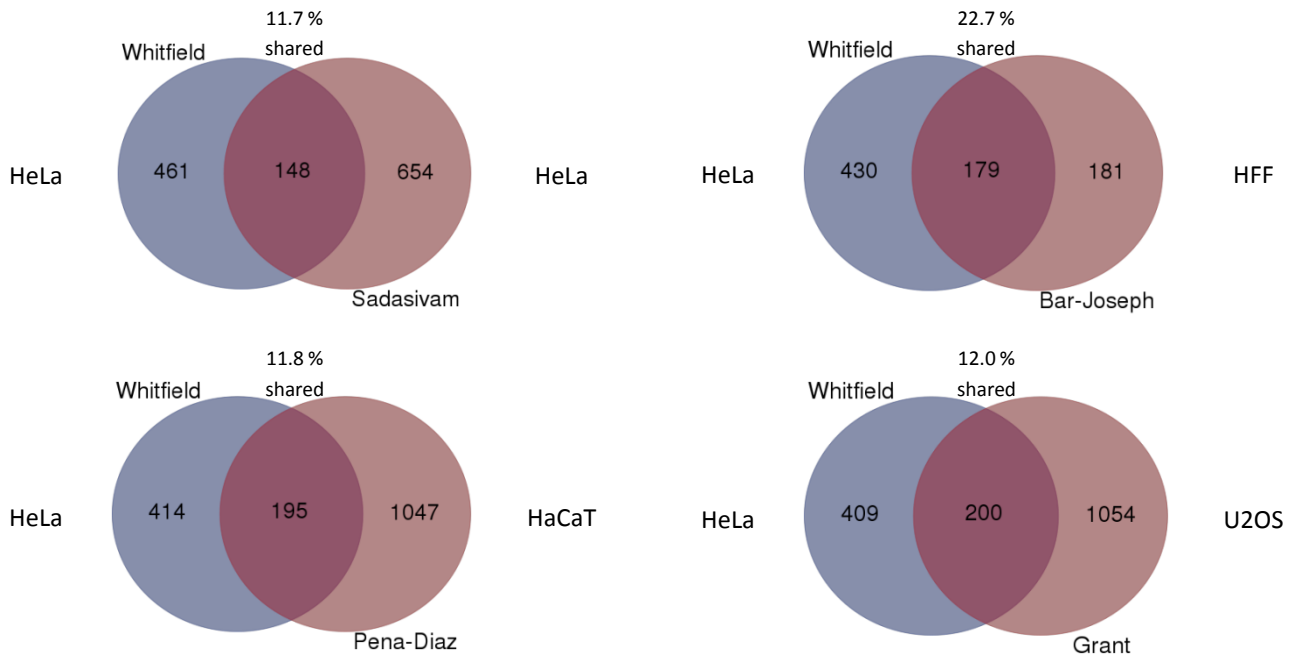

**Supplementary Figure S11. Cell cycle-dependent expression profiling studies have small overlaps.** Venn diagrams displaying the overlap of genes that were detected as being cell cycle-dependently regulated by Whitfield *et al.* compared to the genes detected by Sadasivam *et al.*, Bar-Joseph *et al.*, Pena-Diaz *et al.* and Grant *et al.*

# Fischer *et al.* Supplementary Figure S12

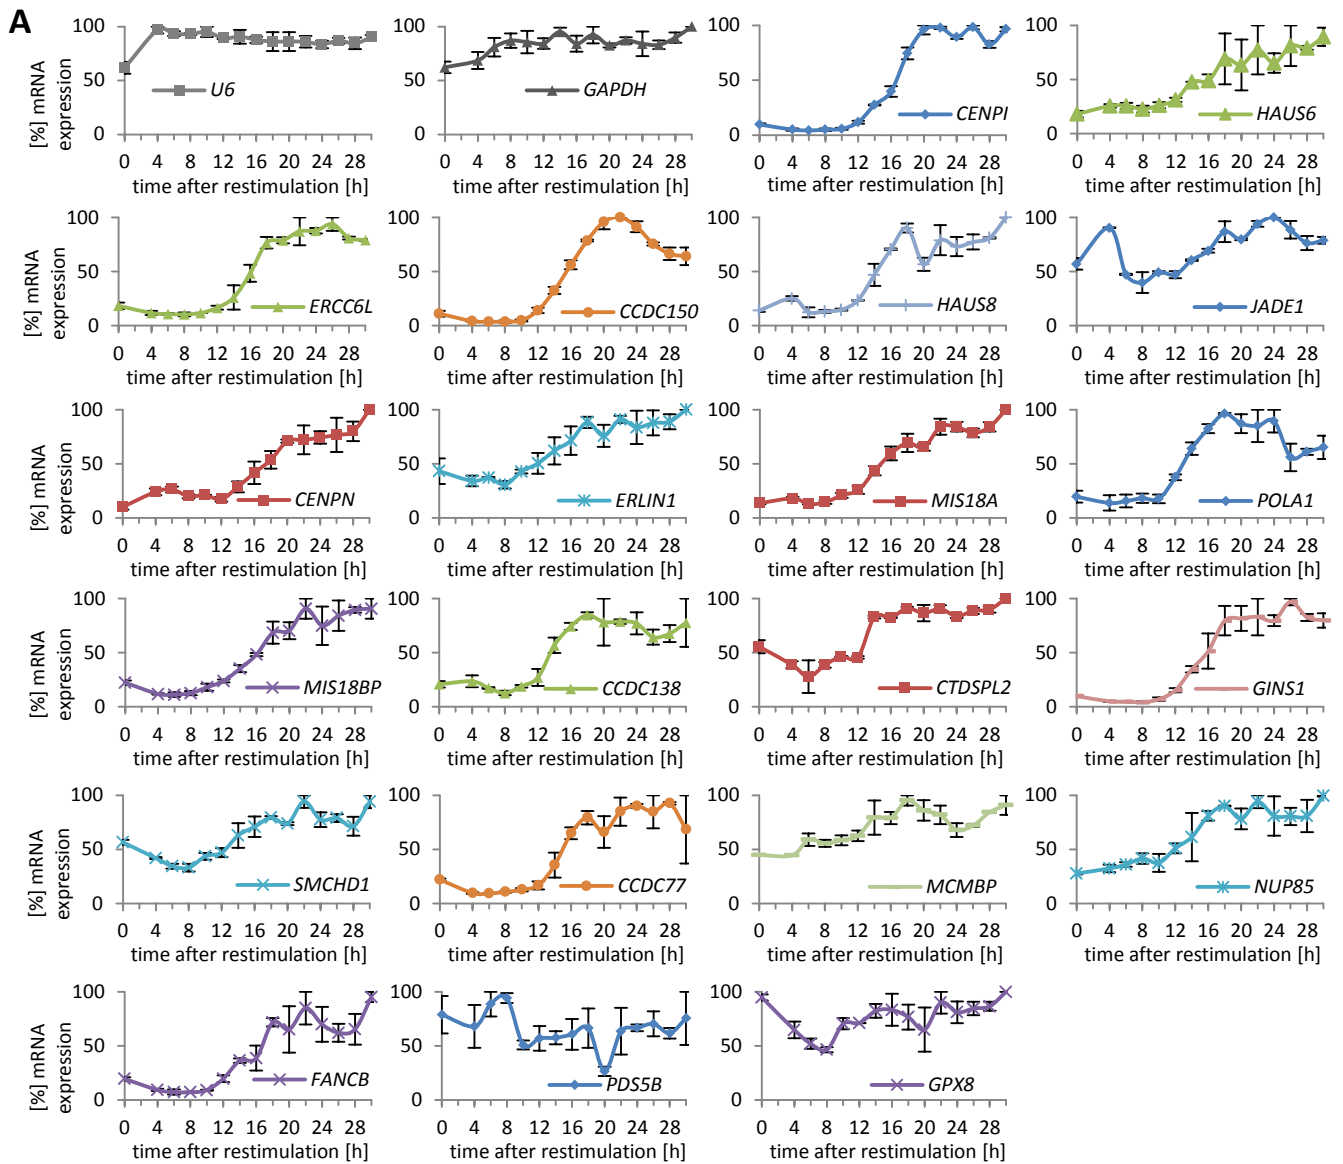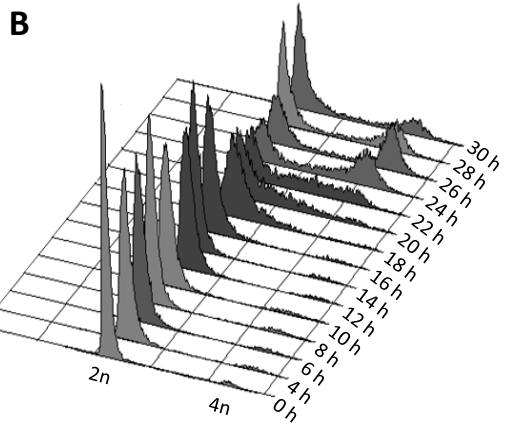

**Supplementary Figure S12. TP53-dependent downregulation is highly predictive for cell cycle genes.** *CENPI*, *HAUS6*, *ERCC6L* (*p53* Expression Score -18), *CCDC150* (-17), *HAUS8*, *JADE1* (-16), *CENPN*, *ERLIN1*, *MIS18A*, *POLA1* (-15), *GPX8*, *MIS18BP1* (-14), *CCDC138*, *CTDSPL2*, *GINS1*, *SMCHD1* (-13), *CCDC77*, *MCMBP*, *NUP85* (-12), *PDS5B* (-11) and *FANCB* (-10). **(A)** Expression levels of indicated mRNAs in HFF cells. Experiments were performed in duplicates. Expression of *U6* and *GAPDH* served as negative controls. **(B)** FACS analysis of HFF cells at indicated time points after serum starvation and serum re-addition. Typically, expression increased strongly during the 12 and 14 h time points.

# Fischer *et al.* Supplementary Figure S13

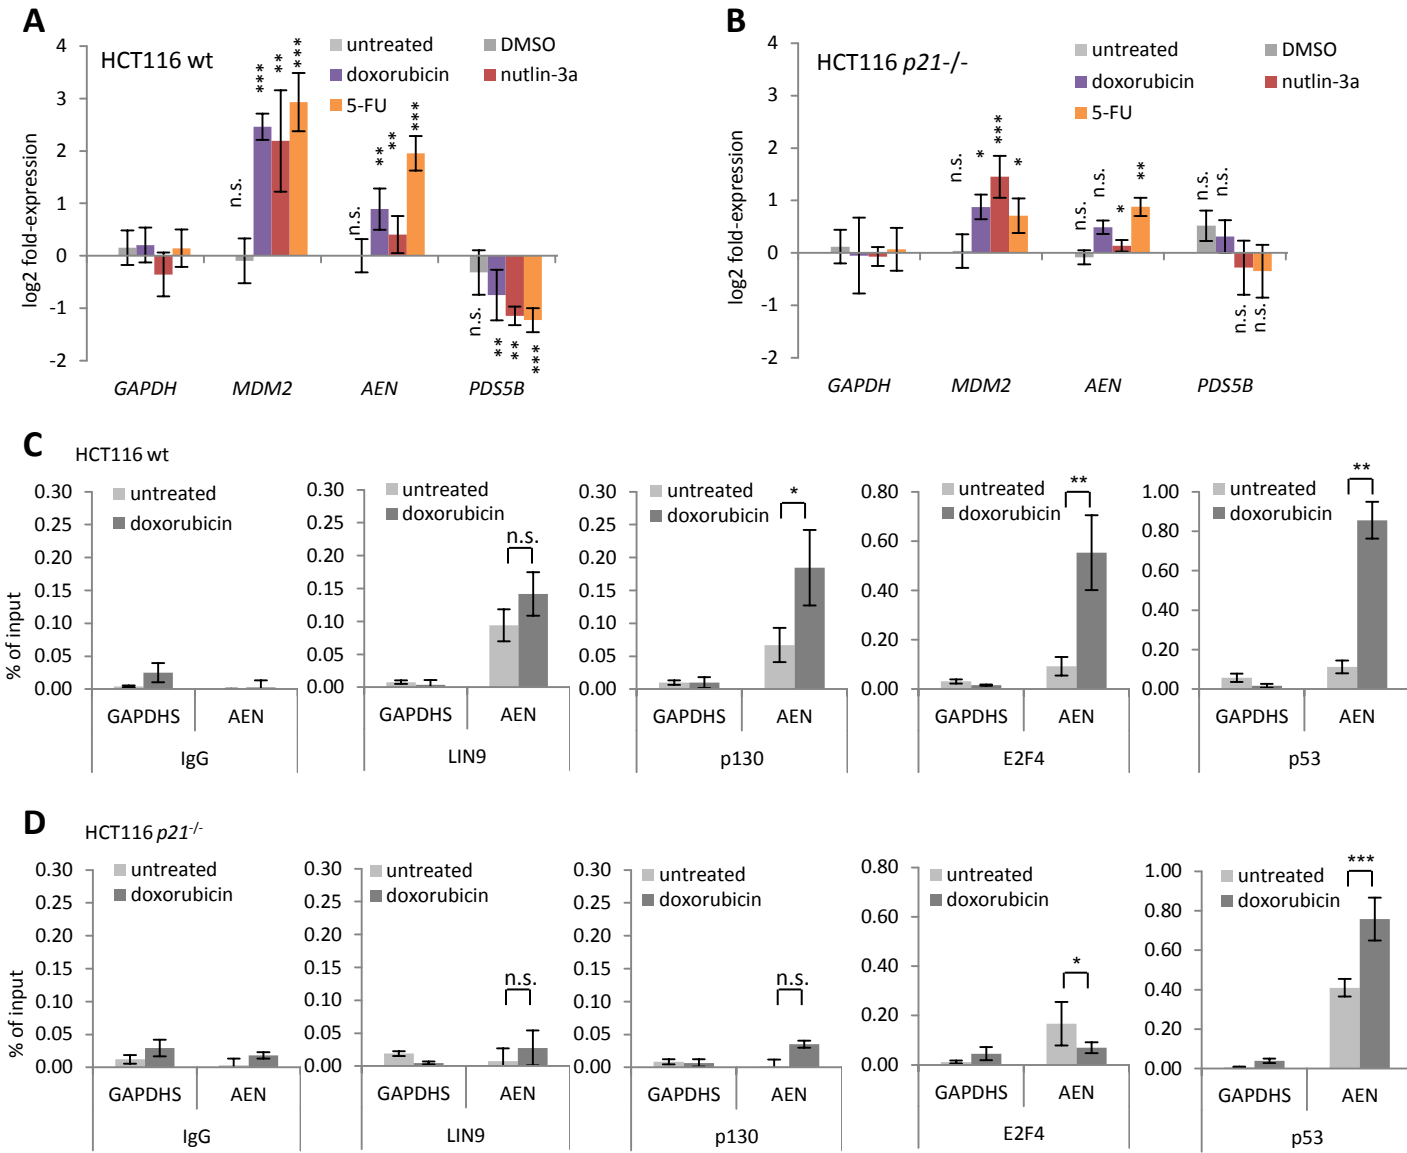

**Supplementary Figure S13. AEN is a target of DREAM and TP53.** The log<sub>2</sub>-fold change of mRNA expression from treated compared to untreated (**A**) HCT116 wild-type and (**B**) HCT116 *p21*<sup>-/-</sup> cells is displayed. Cells were treated with doxorubicin, Nutlin-3a, or 5-FU for 24 h. Untreated cells and cells treated with DMSO served as controls. Normalization was carried out against measurements from untreated cells. *GAPDH* expression served as negative control for p53 response, while *MDM2* was employed as positive control. Experiments were performed with two biological replicates and three technical replicates each (n = 6). Protein binding to *AEN* promoter in untreated or 48 h doxorubicin treated HCT116 (**C**) wild-type or (**D**) *p21*<sup>-/-</sup> cells was tested by ChIP followed by real-time PCR. Protein binding to the *GAPDHS* promoter served as negative control. One representative experiment with three technical replicates (n = 3) is displayed. Significance was tested using the paired Student's t-test; n.s. not significant; \*p ≤ 0.05; \*\*p ≤ 0.01; \*\*\*p ≤ 0.001.

# Fischer *et al.* Supplementary Figure S14

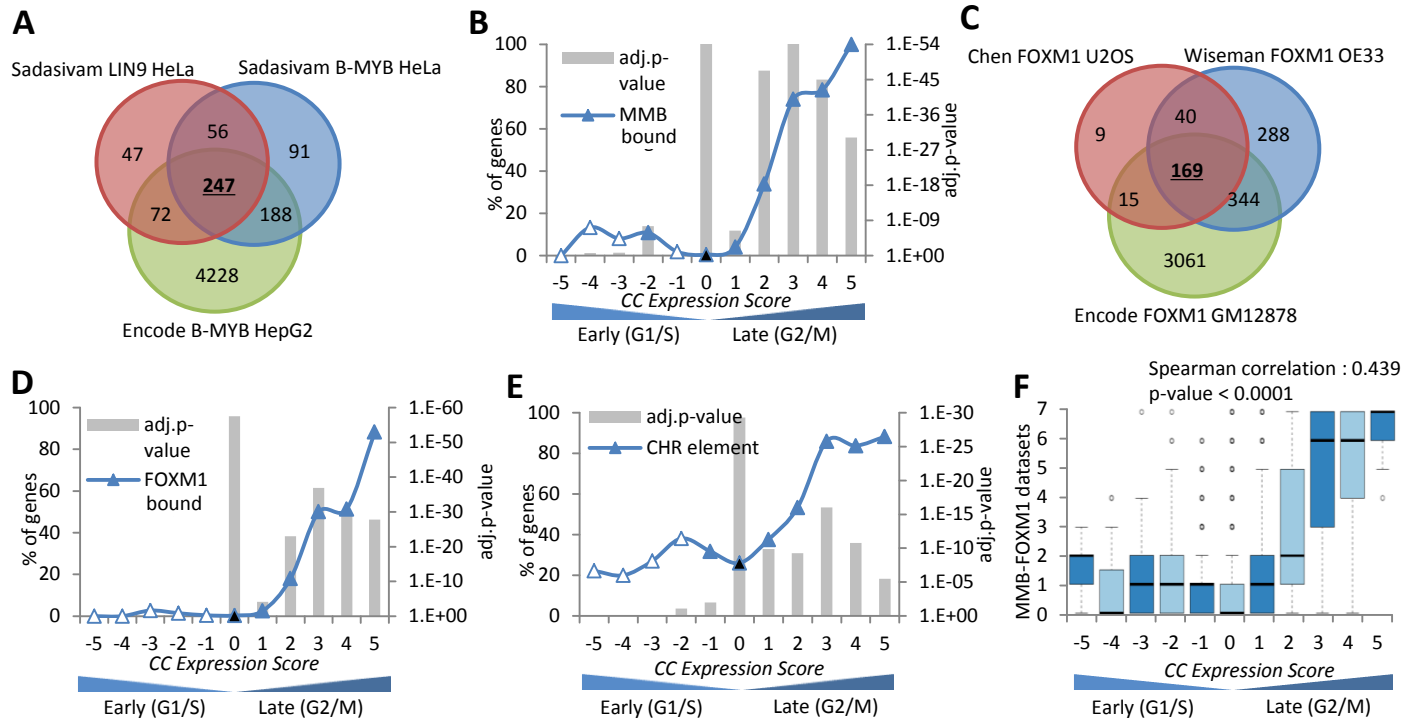

**Supplementary Figure S14. MMB and FOXM1 binding to CHR promoter elements identifies G2/M cell cycle genes.** Venn diagram of overlaps between genes identified as bound in the CHIP-seq datasets of **(A)** MMB components or **(C)** FOXM1. The number of common **(B)** MMB or **(D)** FOXM1 bound genes or **(E)** genes containing conserved CHR elements across the 11 *CC Expression Score* groups. A two-sided Fisher's exact test was employed to test for significant over- and under-representation of gene sets and p-values were adjusted for multiple testing using Bonferroni correction. Colored and black data points are significantly over- and underrepresented, respectively (adj.p-value  $\leq 0.05$ ). White data points are not significantly different. **(F)** Boxplot displaying the sum of these seven MMB-FOXM1 specific datasets across the 11 *CC Expression Score* groups. Correlation coefficient and two-tailed p-value was calculated using GraphPad Prism version 6.00.

# Fischer *et al.* Supplementary Figure S15

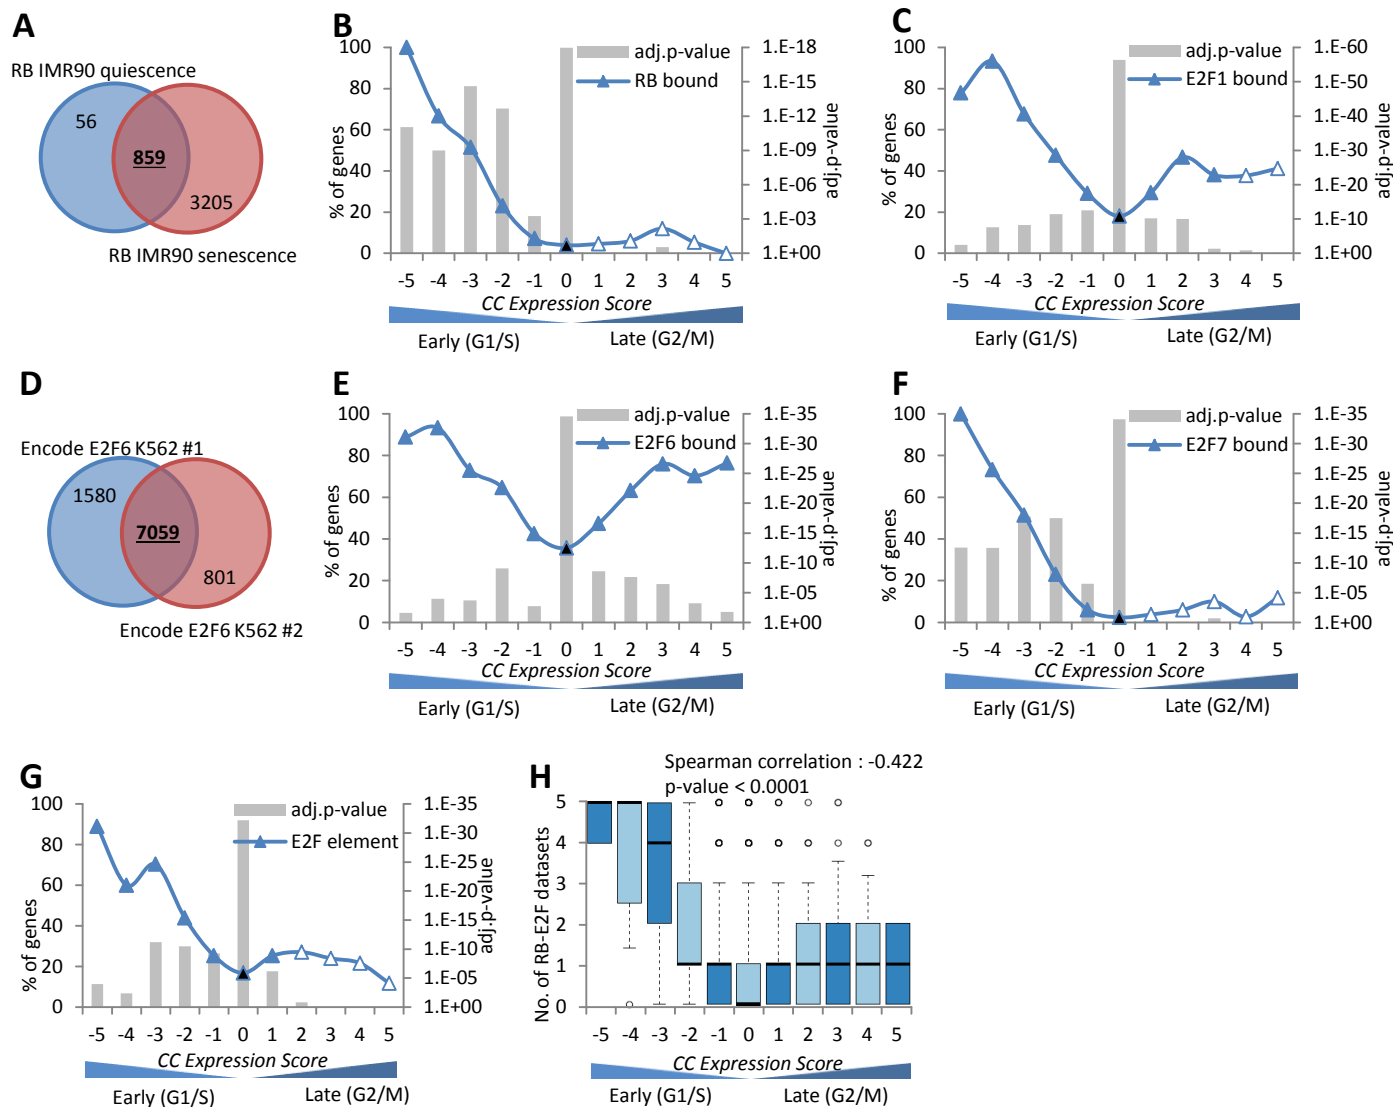

**Supplementary Figure S15. RB, E2F1 and E2F7 binding to E2F promoter elements identifies G1/S cell cycle genes.** Venn diagram of overlaps between genes identified as bound in the ChIP-seq datasets of **(A)** RB or **(D)** E2F6. The number of common **(B)** RB, **(C)** E2F1, **(E)** E2F6 or **(F)** E2F7 bound genes or **(G)** genes containing a conserved E2F DNA element within their promoter is displayed across the 11 *CC Expression Score* groups. A two-sided Fisher's exact test was employed to test for significant over- and under-representation of gene sets and p-values were adjusted for multiple testing using Bonferroni correction. Colored and black data points are significantly over- and underrepresented, respectively (adj.p-value  $\leq 0.05$ ). White data points are not significantly different. **(H)** Boxplot displaying the sum of the five RB-E2F specific datasets across the 11 *CC Expression Score* groups. Correlation coefficient and two-tailed p-value was calculated using GraphPad Prism version 6.00.

# Fischer *et al.* Supplementary Figure S16

**A**

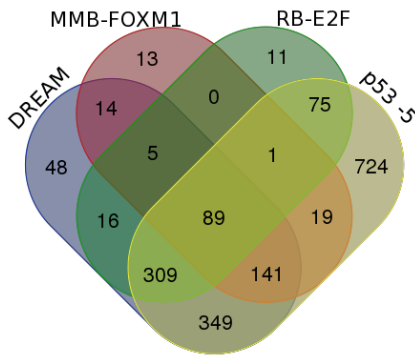

**B**

| Term                                     | FDR      |
|------------------------------------------|----------|
| ncRNA metabolic process                  | 1.37E-05 |
| ncRNA processing                         | 5.94E-04 |
| cellular amino acid biosynthetic process | 8.53E-04 |
| rRNA metabolic process                   | 1.71E-03 |
| ribonucleoprotein complex biogenesis     | 4.20E-03 |
| rRNA processing                          | 4.95E-03 |
| ribosome biogenesis                      | 1.01E-02 |
| RNA processing                           | 2.17E-02 |
| amine biosynthetic process               | 2.71E-02 |

**Supplementary Figure S16. Genes down-regulated by TP53 are primarily targets of DREAM, RB-E2F and MMB-FOXM1. (A)** Venn diagram of overlaps between genes predicted as DREAM, MMB-FOXM1, or RB-E2F target and genes that have a *p53 Expression Score*  $\leq -5$ . **(B)** BP GO terms with their FDR value as identified using the DAVID Functional Annotation Tool enriched among the 724 genes that have a *p53 Expression Score*  $\leq -5$  but are no potential DREAM, RB-E2F, or MMB-FOXM1 targets.
